# Supplementary material
Source: publisher figshare collection journal article supplement (https://frontiersin.figshare.com/ndownloader/files/31477793)
Supplement: Supplementary file [file 31477793]

**Supplementary Table 1:****siRNAs sequences for MSTN and COL1A1 knockdown**

| Fragment name | Sequence (5'-3')    |
|---------------|---------------------|
| si-bta-MSTN   | GCACAAAGACATGTCATGT |
| si-bta-COL1A1 | ACTGGTATATCAGCAAGAA |

**Supplementary Table 2:****Nucleotide sequences of the primers used for real-time quantitative PCR**

| Genes  | Direction | Primer sequence (5'-3') |
|--------|-----------|-------------------------|
| MSTN   | F         | TGTGGAAAAAGAGGGGCTGT    |
|        | R         | AGCTGTTTCCAGGCGAAGTT    |
| Pax7   | F         | AGCCAGAGTTTCAACGGGAG    |
|        | R         | GTCGCCAACAGACAACACAC    |
| MyoD   | F         | ACGGCATGATGGACTACAGC    |
|        | R         | AGGCAGTCGAGGCTCGACA     |
| MyoG   | F         | GGCTGACAAATGCCAGACTATCC |
|        | R         | TGGTCCCTTGCTTTATCTCCCT  |
| MyHC   | F         | CTGGAATCCGGAGGCAGAA     |
|        | R         | TTTTCGAAGGTAGGGAGCGG    |
| COL1A1 | F         | CGGCTACGACTTGAGCTTCCTG  |
|        | R         | GTCACGGACCACATTGGCATCA  |
| COL6A3 | F         | TTCCTCTTGGAGCATTGGCA    |
|        | R         | ATGTGGGTTGCCGTTGAACT    |
| LAMA2  | F         | AGAAGGCTATGCGTTGGTCAGT  |
|        | R         | TCAGGTCTCGTGTGGCAAGGTA  |
| Rock1  | F         | ACCAGGAAGGTGTACGCTATGA  |
|        | R         | GCTGAACAACCCAAGGACTGT   |
| VASP   | F         | CCCTGGGAGAAGAACAGCACAA  |
|        | R         | CGTCACTGGAAGTAGGCGTAGC  |
| FLNB   | F         | CAAGCCTGCCGAGTTCACCATC  |
|        | R         | CCATCGCCGTTGTCTGAGCATT  |
| FAK    | F         | TGGCTGCTGCTTACCTTGACC   |
|        | R         | AGAACGCTCCACACCAGTCC    |
| Rac1   | F         | TCCCAACACACCCATCATCCT   |
|        | R         | GGCGTCAGCTTCTTCTCCTTC   |
| RhoA   | F         | GATGTCCAACCCACCTGACC    |
|        | R         | AATTAGCGCCTGGTGTGTCA    |

|         |   |                         |
|---------|---|-------------------------|
| CDC42   | F | ACGACCGCTGAGTTATCCACAA  |
|         | R | GGGTCCCAACAAGCAAGAAAGG  |
| ACTN4   | F | GGAGCGGTTACCTAAGCCAGAG  |
|         | R | GCGATGAAGTCCAGTGCCTTGT  |
| MYL6    | F | CTATGAAGCGTTTGTGAGGCA   |
|         | R | CCTCAGCCATTCAGCACCAT    |
| MYL9    | F | CCTGCTCCACATATAACCGT    |
|         | R | CTCAGCCCGTTTCCTTCACT    |
| MYL12A  | F | AGCCAAACGTTCCCTTGTTGC   |
|         | R | AGAGATGCATGTGCCCAAA     |
| RPS6    | F | CGAATCAGTGGCGGGAACGATA  |
|         | R | ACTCAGTAGCAGGCGAACTCTG  |
| EIF4B   | F | TCGTGATGGGTATCGGGACAGT  |
|         | R | AGTCTCTGCCACCTCGGTCAT   |
| HSP90B1 | F | GAGTCTCCGTGTGCTCTGGTAG  |
|         | R | TGTCCTTGCCCTGTCTGGTATGC |
| PPP2CA  | F | GGGTCCAATGTGTGACTTGC    |
|         | R | CCTGCCCCAAAGGTGTAACCA   |
| TUBB    | F | CAACAGCACAGCCATCCAGGA   |
|         | R | TCTCAGCCTCGGTGAACTCCAT  |

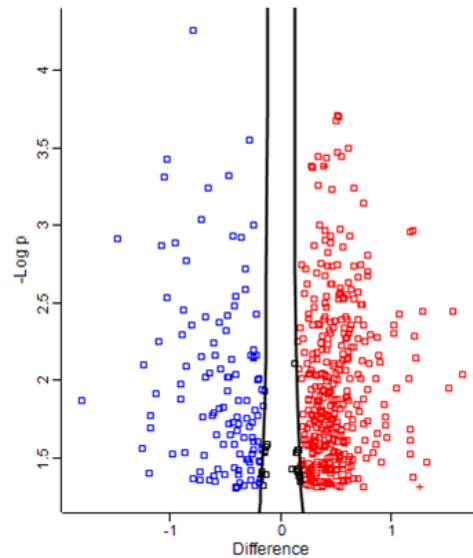

**Supplementary Figure 1: Volcanic map of differentially expressed proteins.**

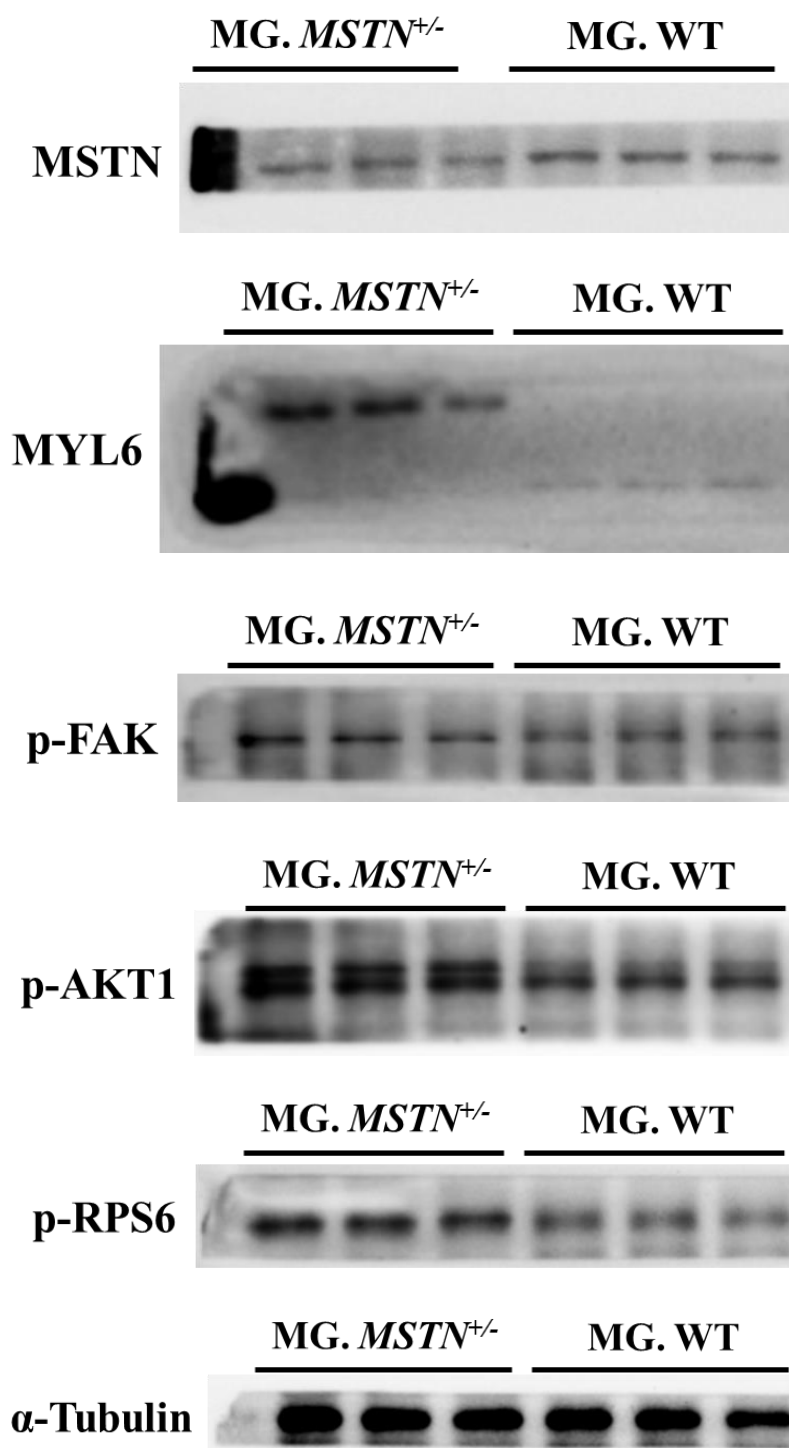

**Supplementary Figure 2: Western blot result of MSTN, MYL6, pFAK(Tyr-473), pAKT1(Ser-473) and pRPS6(Ser-235/236) in muscle tissue.**

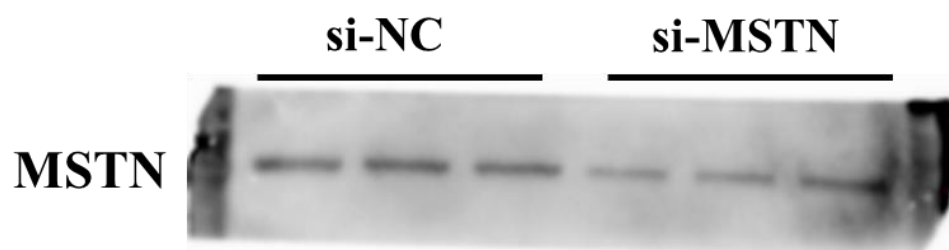

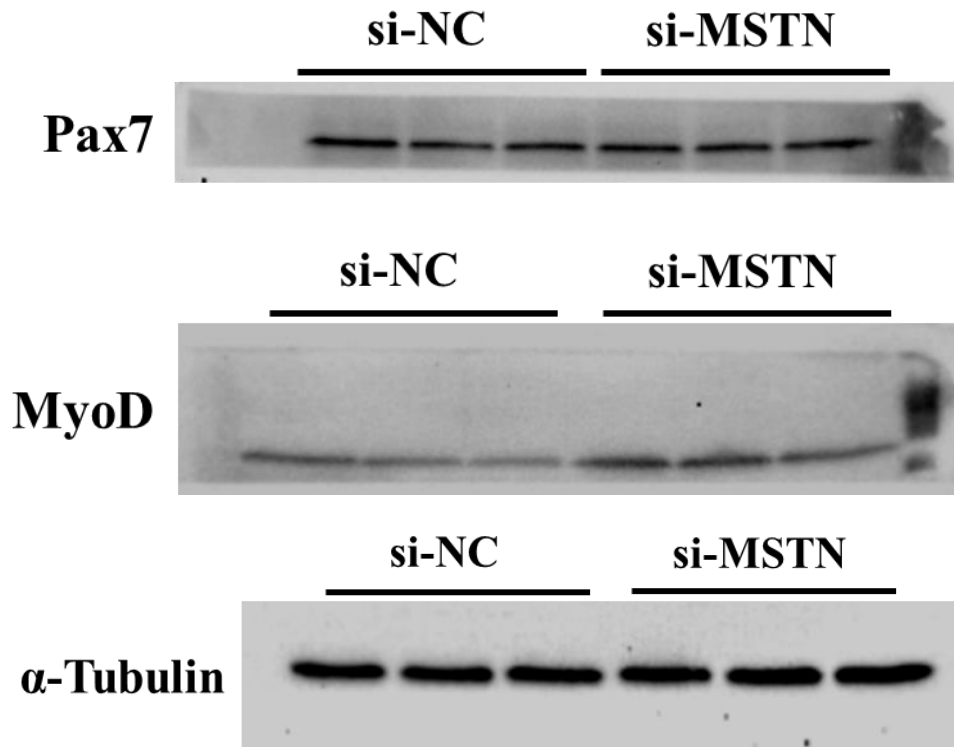

**Supplementary Figure 3: Western blot result of MSTN, Pax7 and MyoD proteins in GM bovine skeletal muscle satellite cells.**

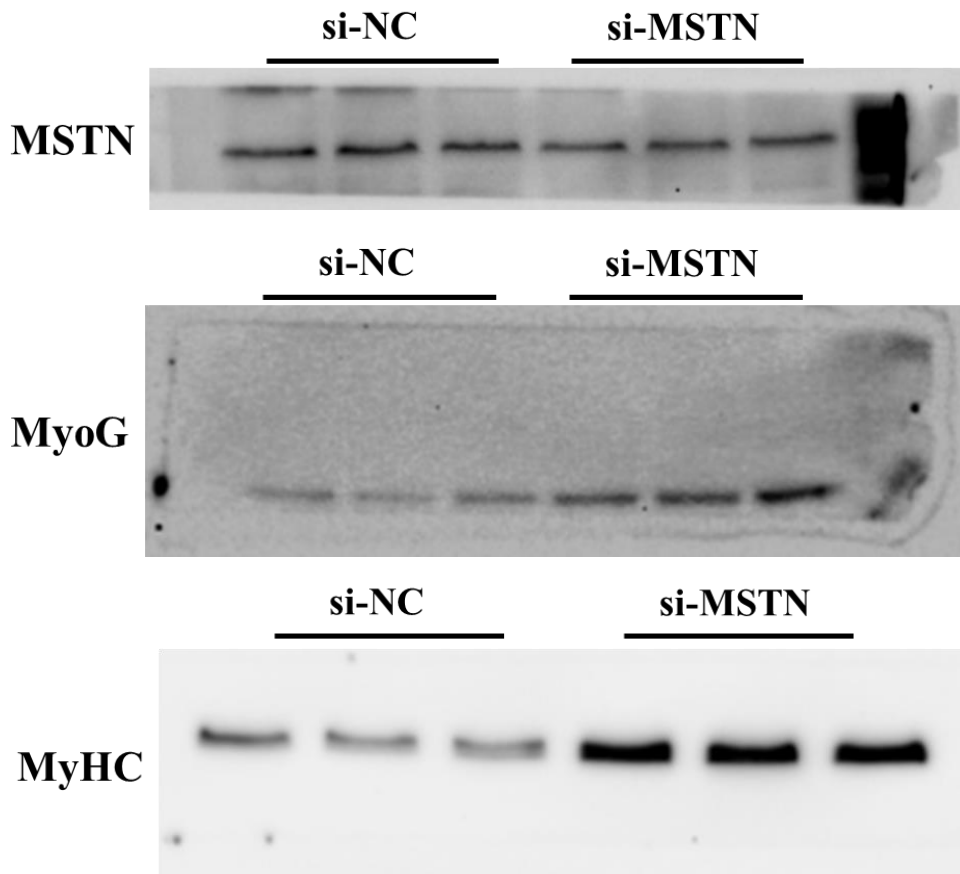

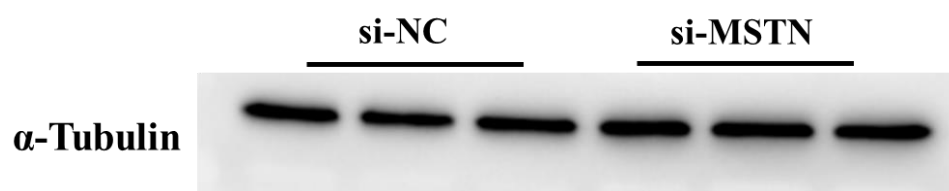

**Supplementary Figure 4: Western blot result of MSTN, MyoG and MyHC proteins in DM3 bovine skeletal muscle satellite cells.**

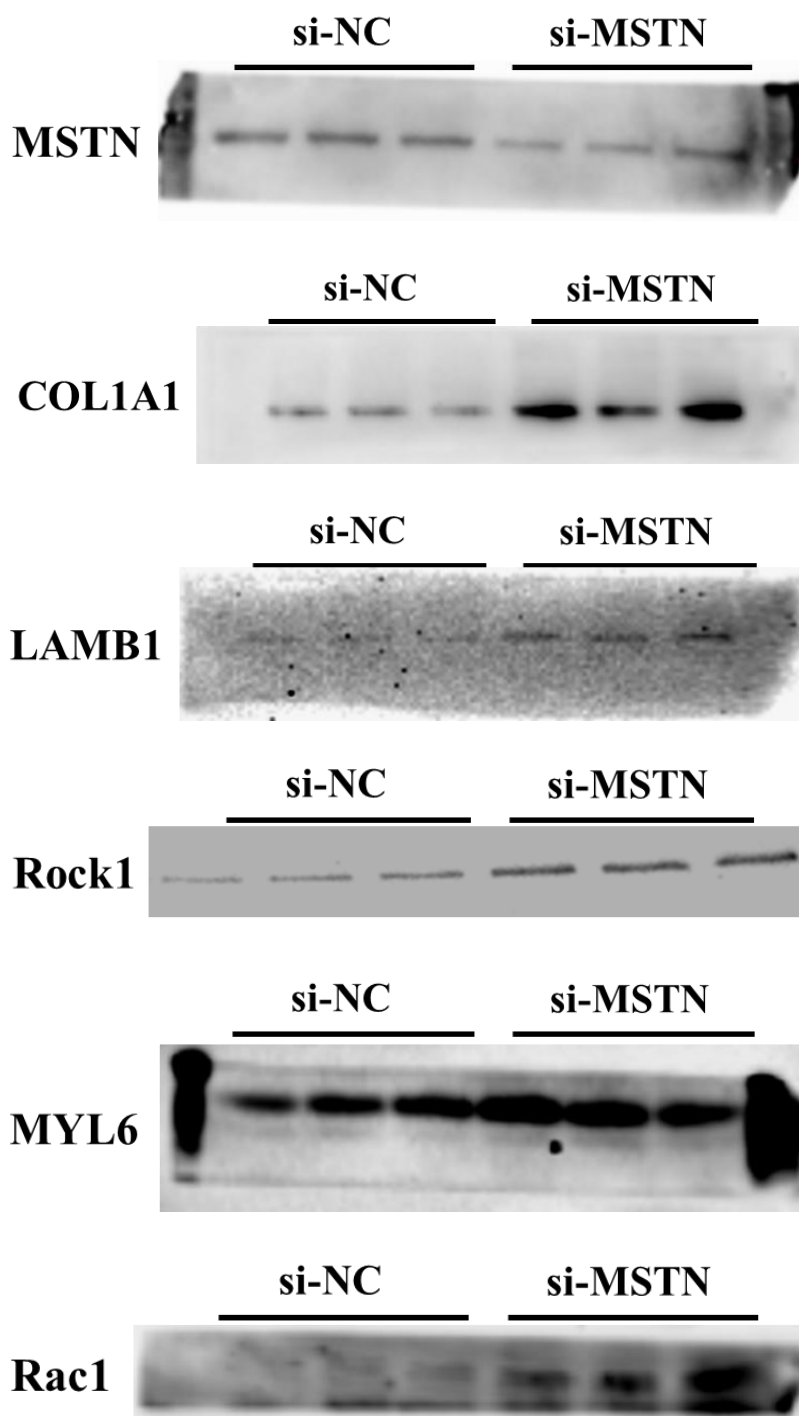

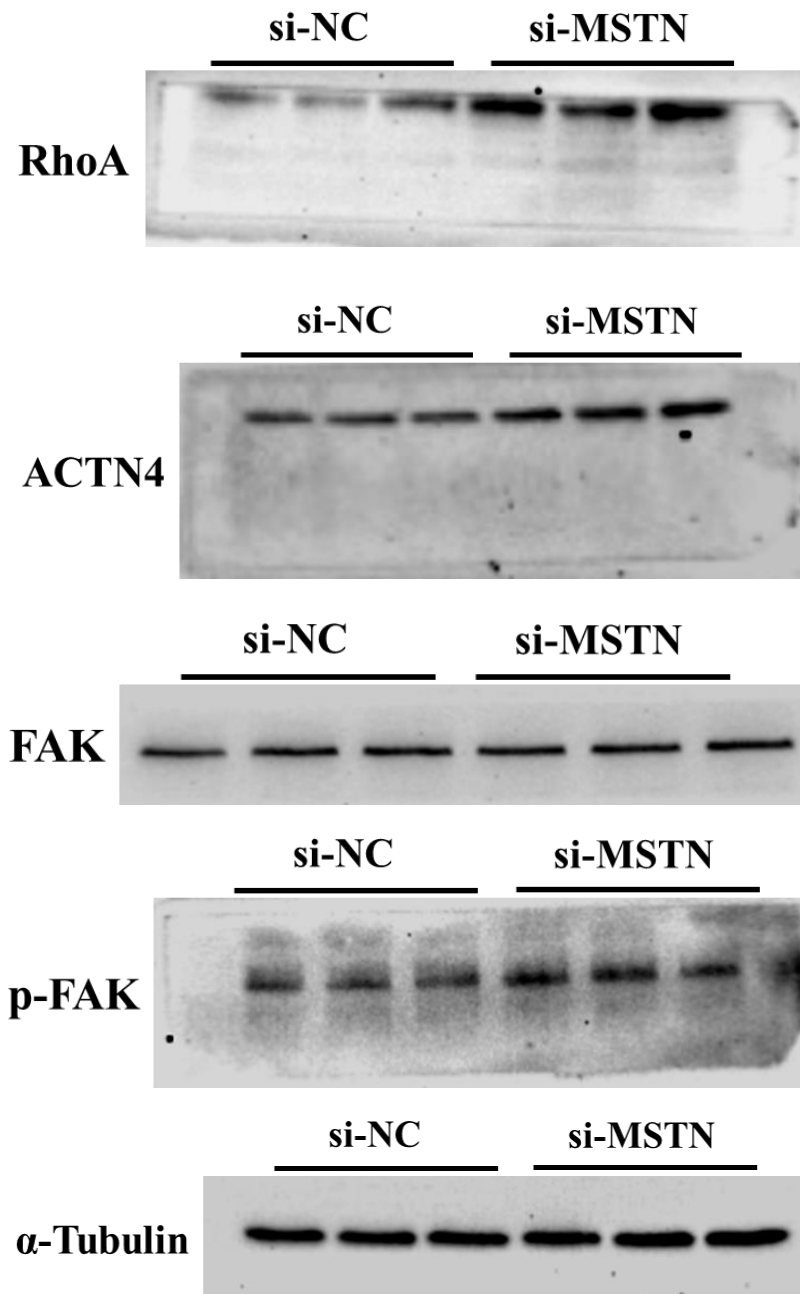

**Supplementary Figure 5: Western blot result of MSTN, COL1A1, LAMB1, Rock1, MYL6, Rac1, RhoA, ACTN4, FAK and pFAK (Tyr-473) in GM bovine skeletal muscle satellite cells.**

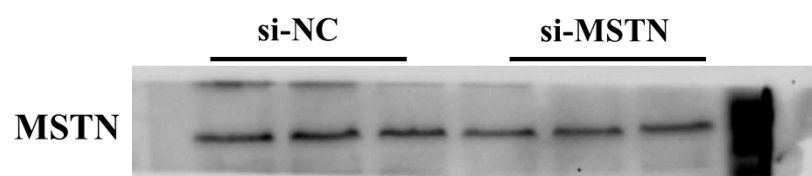

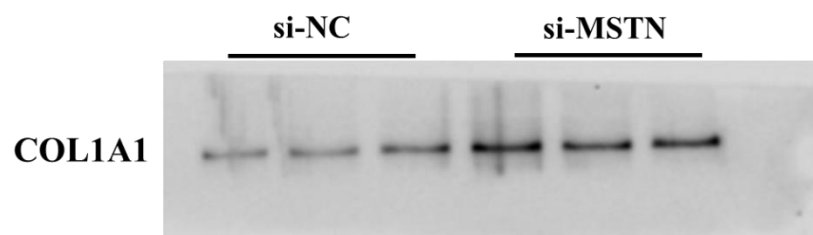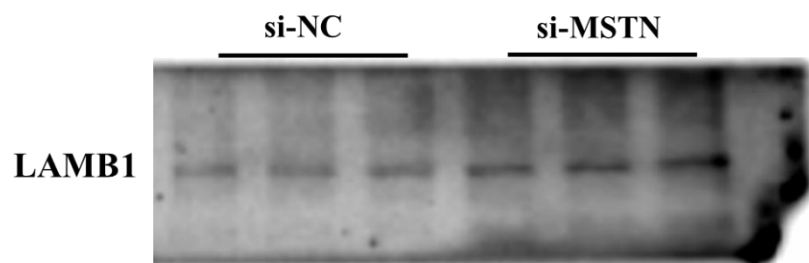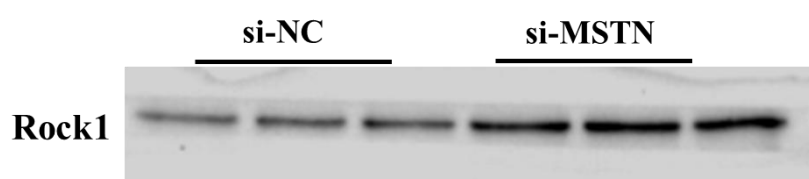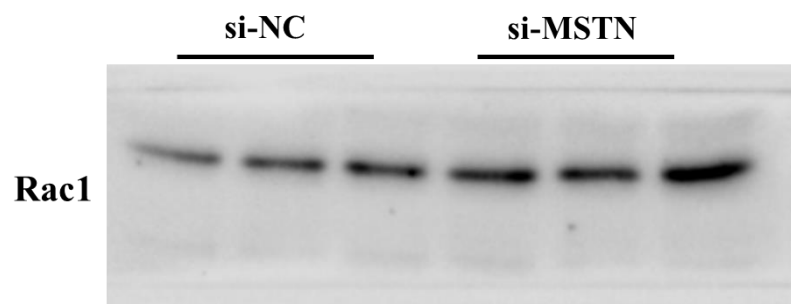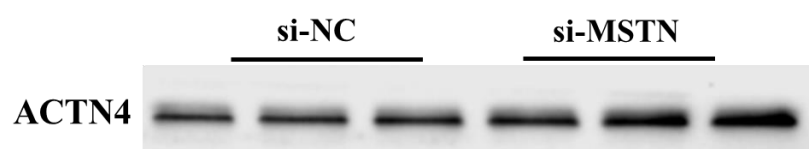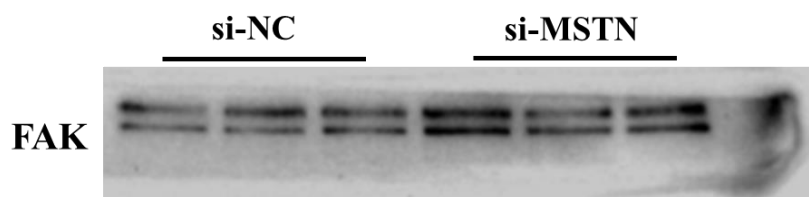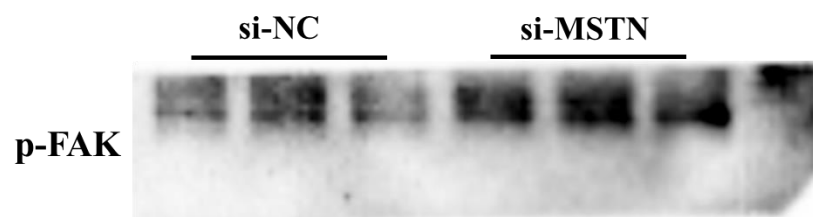

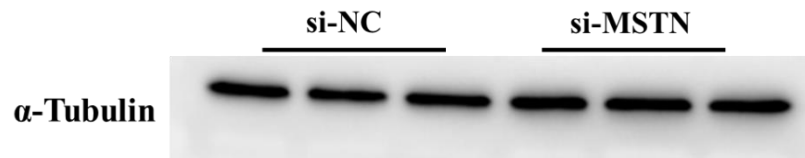

**Supplementary Figure 6: Western blot result of MSTN, COL1A1, LAMB1, Rock1, Rac1, ACTN4, FAK and pFAK (Tyr-473) in DM3 bovine skeletal muscle satellite cells.**

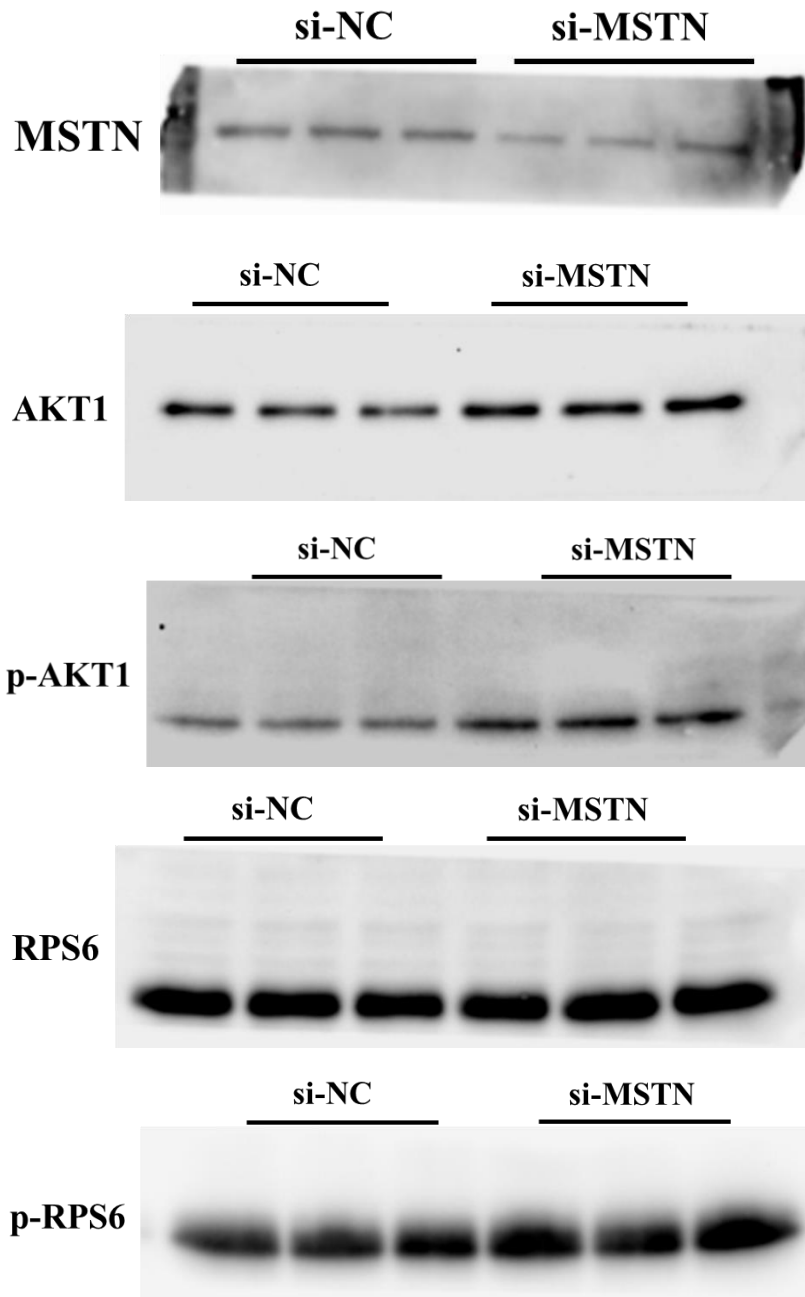



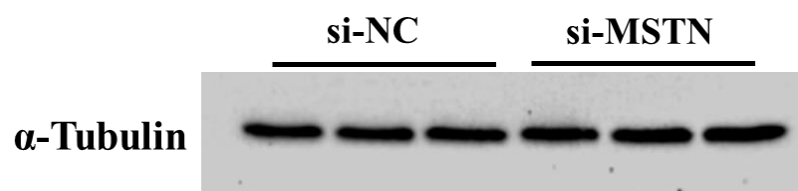

**Supplementary Figure 7: Western blot result of MSTN, AKT1, pAKT1 (Ser-473), RPS6 and pRPS6 (Ser-235/236) in GM bovine skeletal muscle satellite cells.**

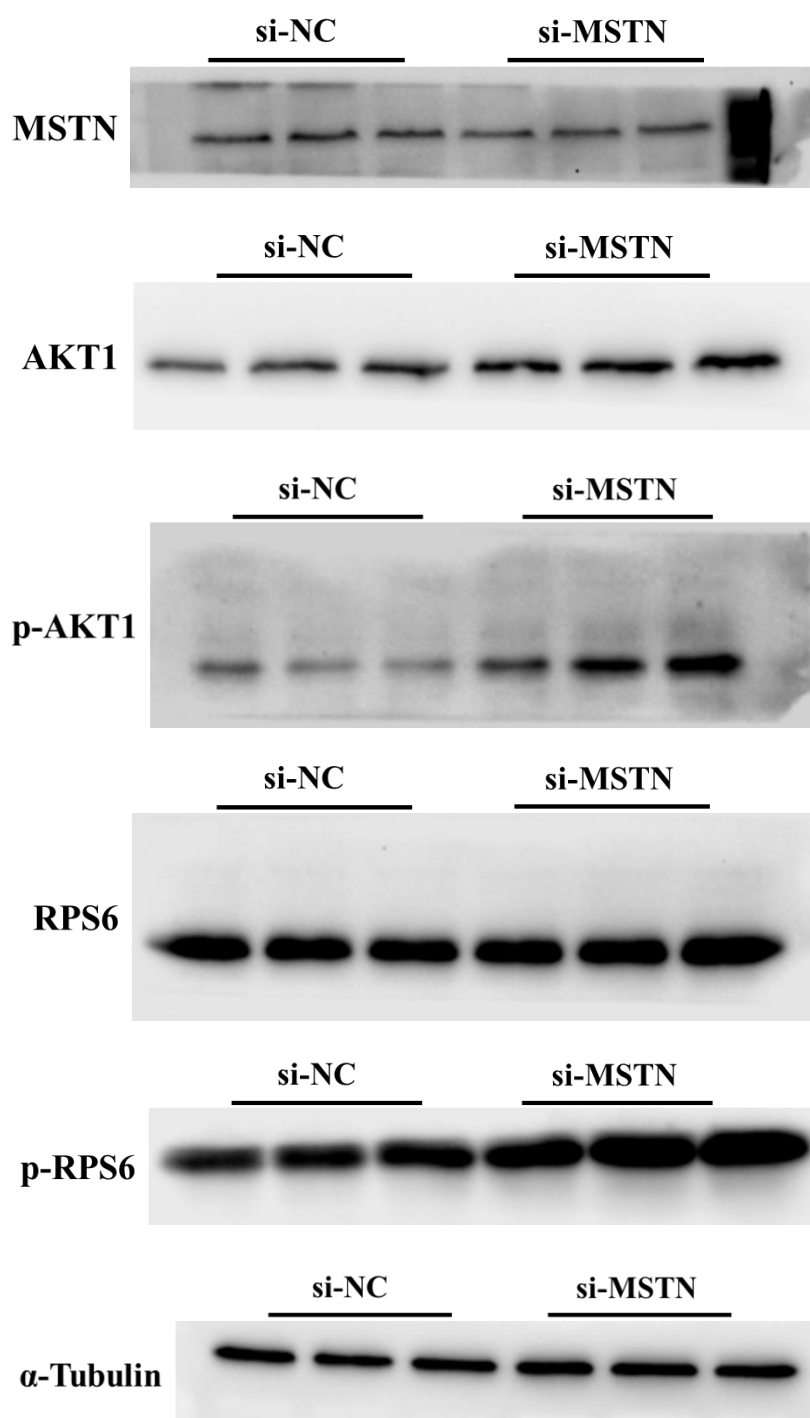

**Supplementary Figure 8: Western blot result of MSTN, AKT1, pAKT1 (Ser-473), RPS6 and**

pRPS6 (Ser-235/236) in DM3 bovine skeletal muscle satellite cells.

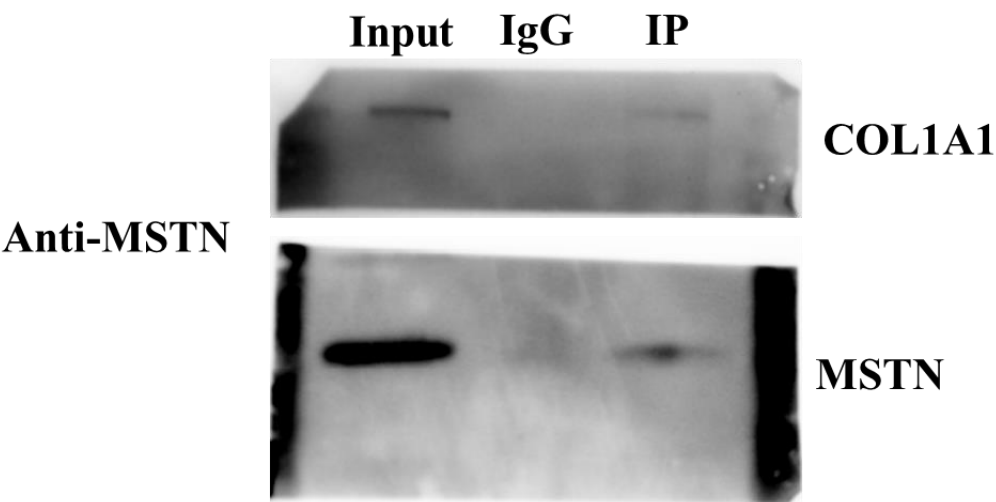

Supplementary Figure 9: CO-IP result of MSTN and COL1A1 proteins.

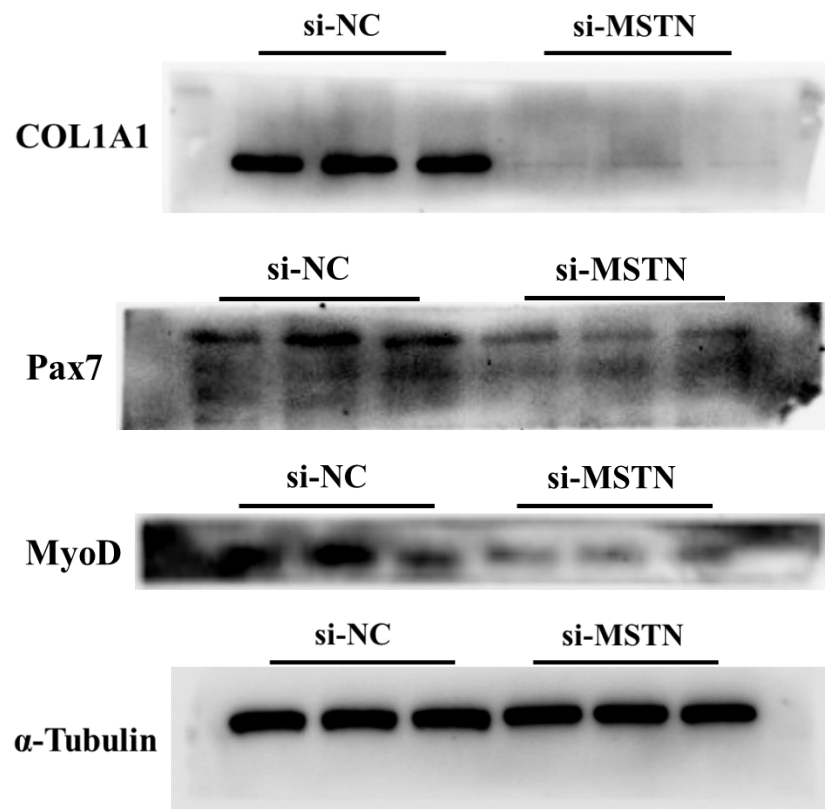

Supplementary Figure 10: Western blot result of COL1A1, Pax7 and MyoD proteins.

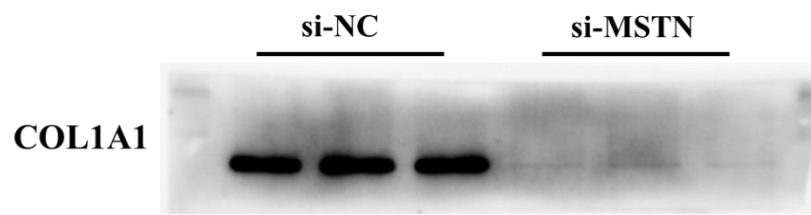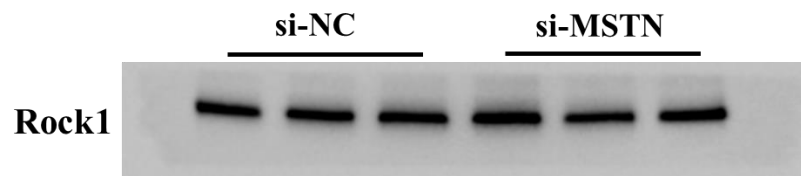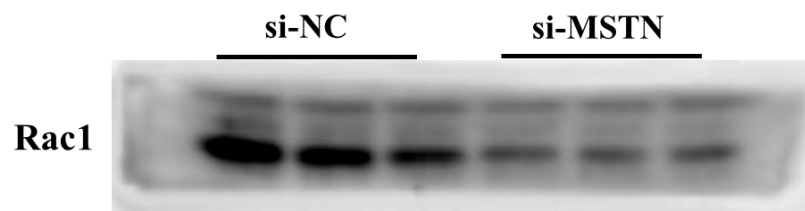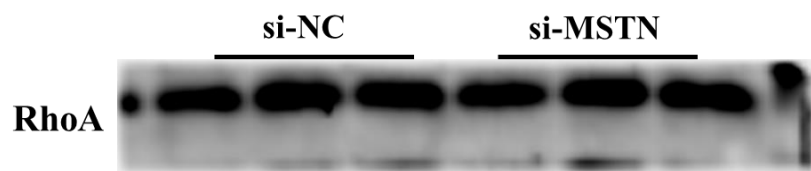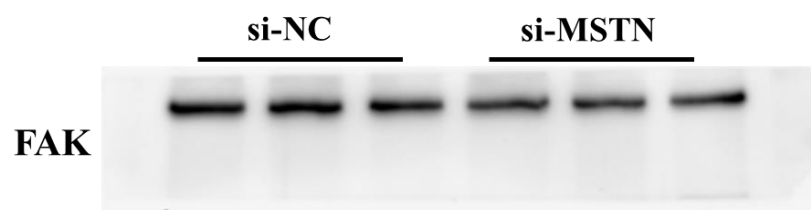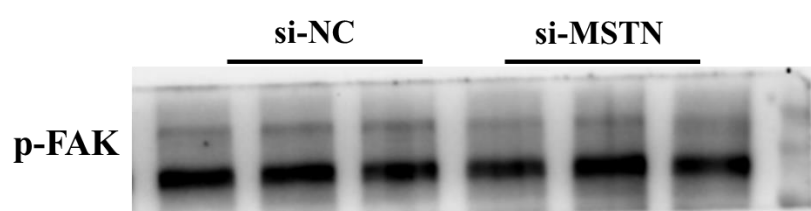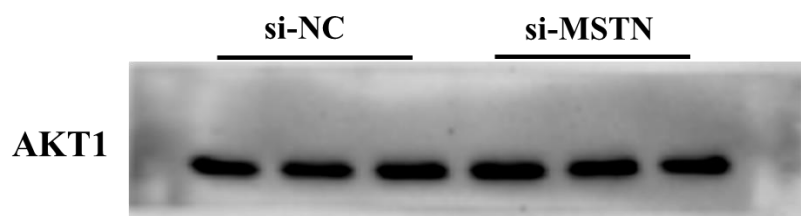

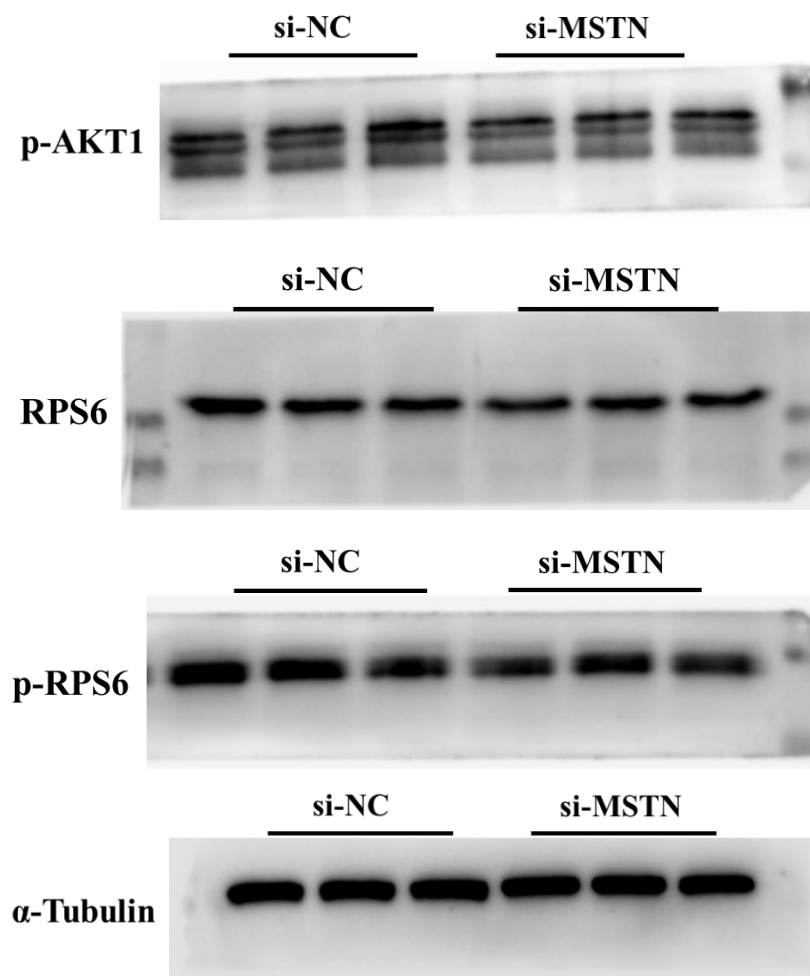

**Supplementary Figure 11: Western blot result of COL1A1, Rock1, Rac1, RhoA, FAK, pFAK(Tyr-473), AKT1, pAKT1(Ser-473), RPS6 and pRPS6(Ser-235/236).**
